# Supplementary material for: Integrated analysis of multimodal single-cell data with structural similarity
Source: PubMed Central journal article supplement — Nucleic Acids Res. 2022 Sep 21;50(21):e121. doi: 10.1093/nar/gkac781 (PMC9757079; doi:10.1093/nar/gkac781), 2022-09-21
Supplement: gkac781_supplemental_file.pdf [file gkac781_supplemental_file.pdf]

# Supplementary Materials for Integrated Analysis of Multimodal Single-Cell Data with Structural Similarity

Yingxin Cao<sup>1,5,6\*</sup>, Laiyi Fu<sup>1,2 \*</sup>, Jie Wu<sup>3</sup>, Qinke Peng<sup>2</sup>, Qing Nie<sup>4,5,6</sup>, Jing  
Zhang<sup>1 \*\*</sup>, and Xiaohui Xie<sup>1 \*\*</sup>

<sup>1</sup> Department of Computer Science, University of California, Irvine, CA, 92697, USA

<sup>2</sup> Systems Engineering Institute, School of Electronic and Information Engineering,  
Xi'an Jiaotong University, Xi'an, Shanxi, 710049, China

<sup>3</sup> Department of Biological Chemistry, University of California, Irvine, CA, 92697,  
USA

<sup>4</sup> Department of Mathematics, University of California, Irvine, CA, 92697, USA

<sup>5</sup> Center for Complex Biological Systems, University of California, Irvine, CA, 92697,  
USA

<sup>6</sup> NSF-Simons Center for Multiscale Cell Fate Research, University of California,  
Irvine, CA, 92697, USA

---

\* Equal contributions

\*\* To whom correspondence should be addressed

## Table of Contents

|   |                                            |   |
|---|--------------------------------------------|---|
| 1 | Results on Hyperparameter Stability .....  | 3 |
| 2 | Cell Type Specific Marker Genes .....      | 4 |
| 3 | Extra Results on Clustering .....          | 6 |
| 4 | Results on Share-seq Dataset .....         | 7 |
| 5 | Results on Batch Correction .....          | 8 |
| 6 | Results on Motif Enrichment Analysis ..... | 9 |

### List of Tables

|    |                                                                              |   |
|----|------------------------------------------------------------------------------|---|
| S1 | List of cell-type specific marker genes used to visualize expressions. . . . | 4 |
| S2 | Mean expressions of markers on cells clustered by different methods. . .     | 5 |

### List of Figures

|    |                                                           |   |
|----|-----------------------------------------------------------|---|
| S1 | Hyperparameter Stability .....                            | 3 |
| S2 | Marker Gene Activities in the PBMC Dataset .....          | 4 |
| S3 | Marker Gene Expressions in the PBMC Dataset .....         | 5 |
| S4 | Clustering scores .....                                   | 6 |
| S5 | Comparisons of embeddings .....                           | 7 |
| S6 | Results on Share-seq dataset .....                        | 7 |
| S7 | Batch Effect Correction .....                             | 8 |
| S8 | Clustering result on batches with unique cell types. .... | 8 |
| S9 | Motif enrichment scores on imputed data .....             | 9 |

## 1 Results on Hyperparameter Stability

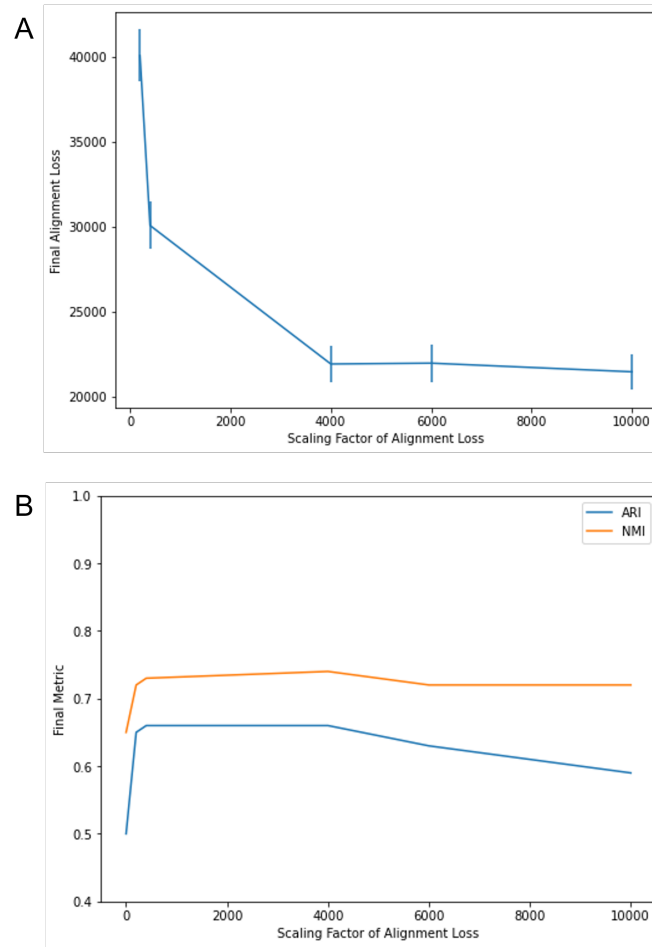

**Fig. S1:** Results on hyperparameter stability. (A) The alignment loss  $L_{Local}$  decreases as the scaling factor increases. (B) Clustering metrics ARI and NMI as a function of scaling factor.



sion of marker genes of different methods. Pairwise t-tests between SAILERX and other methods indicate whether the marker genes from SAILERX show significantly higher expression than those from other methods. T-test p-values are indicated by ns (p-value > 0.05, i.e., not significant), \* (p-value < 0.05), \*\* (p-value < 0.01) and \*\*\* (p-value < 0.001). The plots show that the marker genes show overall higher expression in corresponding cell clusters discovered by SAILERX than those by other methods.

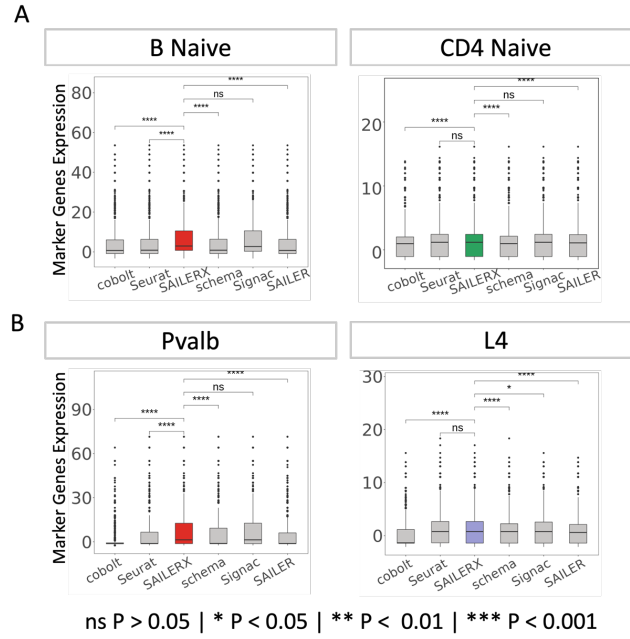

**Fig. S3:** Comparing the expression of marker genes in clusters derived by different methods. (A) Mean expression of marker genes of B Naive cells and CD4 Naive cells from PBMC 10k dataset. (B) Mean expression of marker genes of Pvalb cells and L4 cells from SNARE-seq dataset.

**Table S2:** Mean expressions of markers on cells clustered by different methods.

| Cell Type | SAILERX     | Seurat      | Signac | Cobolt | Schema | SAILER |
|-----------|-------------|-------------|--------|--------|--------|--------|
| Pvalb     | <b>7.10</b> | 4.25        | 7.07   | 0.72   | 5.01   | 3.71   |
| L4        | <b>1.05</b> | <b>1.11</b> | 0.97   | -0.01  | 0.92   | 0.77   |
| B naive   | <b>6.29</b> | 3.60        | 6.09   | 3.55   | 3.68   | 3.60   |
| CD4       | <b>1.36</b> | 1.34        | 1.34   | 1.05   | 1.07   | 1.23   |

### 3 Extra Results on Clustering

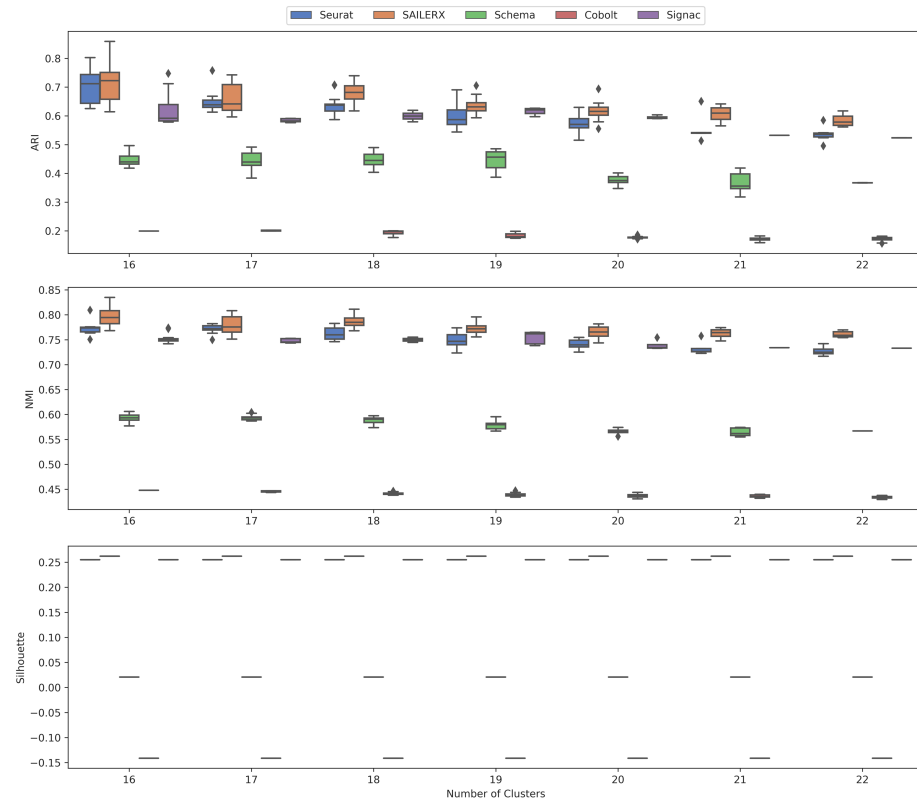

**Fig. S4:** Clustering scores of PBMC 10k dataset by different number of identified clusters.

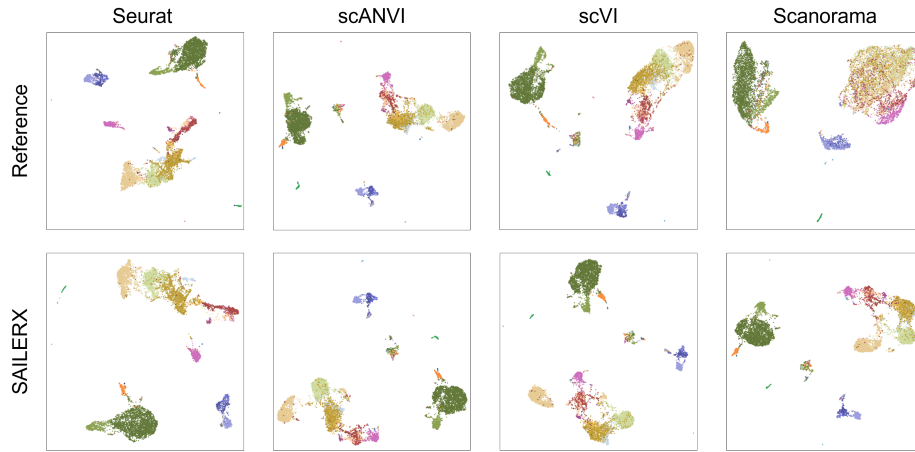

**Fig. S5:** UMAP Visualizations of reference embeddings vs SAILERX embeddings. Top row: UMAP visualizations of reference gene expression embeddings generated by different methods. Bottom row: joint embeddings generated by SAILERX after training.

#### 4 Results on Share-seq Dataset

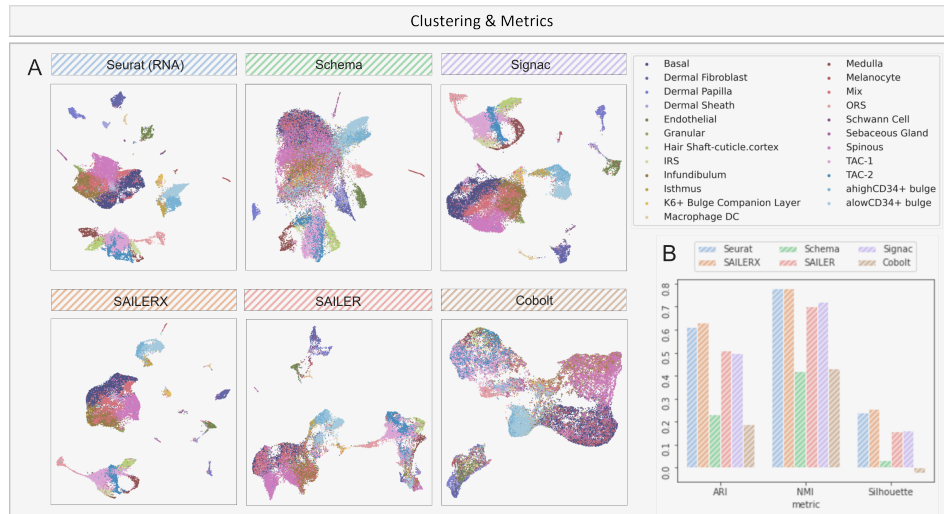

**Fig. S6:** Results on Share-seq dataset. Cells colored by ground truth label. (A) UMAP visualizations of embeddings on mouse skin Share-seq dataset generated by different methods. (B) Quantitative metrics of ARI, NMI and Silhouette Score on clustering.

## 5 Results on Batch Correction

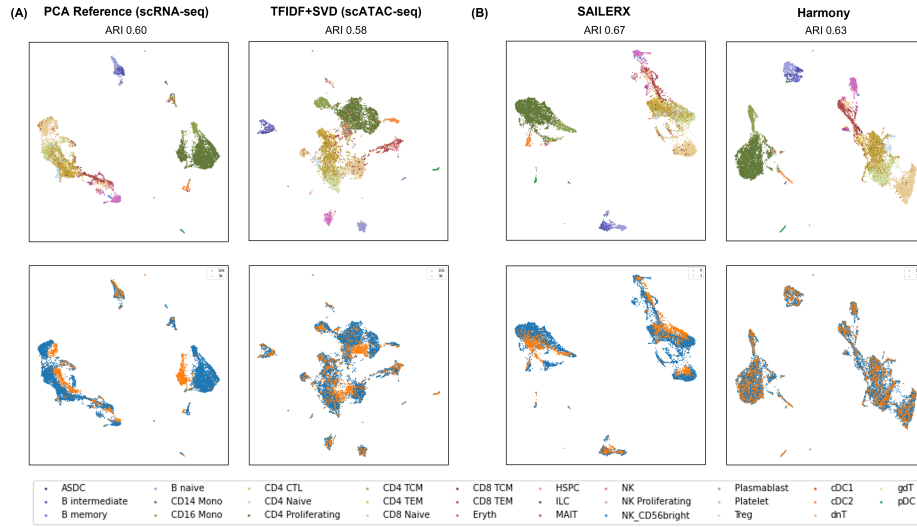

**Fig. S7:** Results on batch effect correction on PBMC 10k and 3k datasets. (A) UMAP Visualizations of PCA (left) embedding on gene expression modality and TF-IDF + SVD (right) embedding on chromatin accessibility modality before batch effect corrections. (B) UMAP visualization of embeddings after batch effect correction. Top row: colored by cell types; Bottom row: colored by batches.

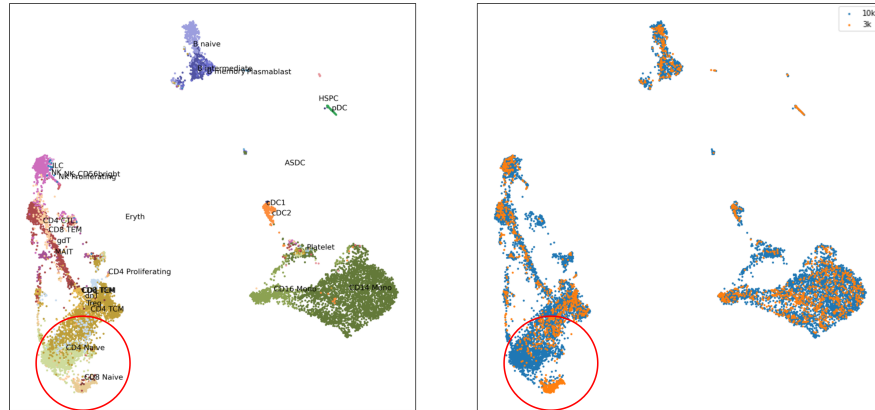

**Fig. S8:** UMAP visualizations of the embedding generated by SAILERX. Left: colored by cell types; Right: colored by batches.



## 6 Results on Motif Enrichment Analysis

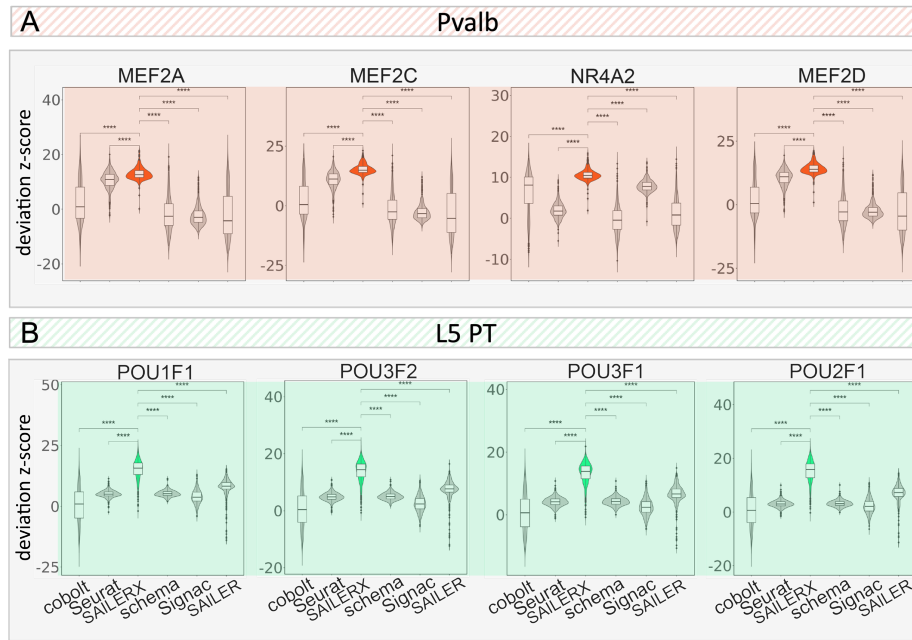

**Fig. S9:** Motif deviation z-scores on cells identified as (A) Pvalb and (B) L5 PT by different methods from SNARE-seq imputed data. The data is imputed through SAILERX. For each cell type, four enriched motifs are selected. Pairwise t-tests are performed between SAILERX and all other methods. Three-stars refers to differential significance between two methods (p-value less than 0.05).
